# Supplementary material
Source: Springer Nature journal article supplement (https://www.springermedizin.de/resource/supplementary/12901_2009_60_MOESM1_ESM.pdf/9515438)

### Overall Survival for all patients

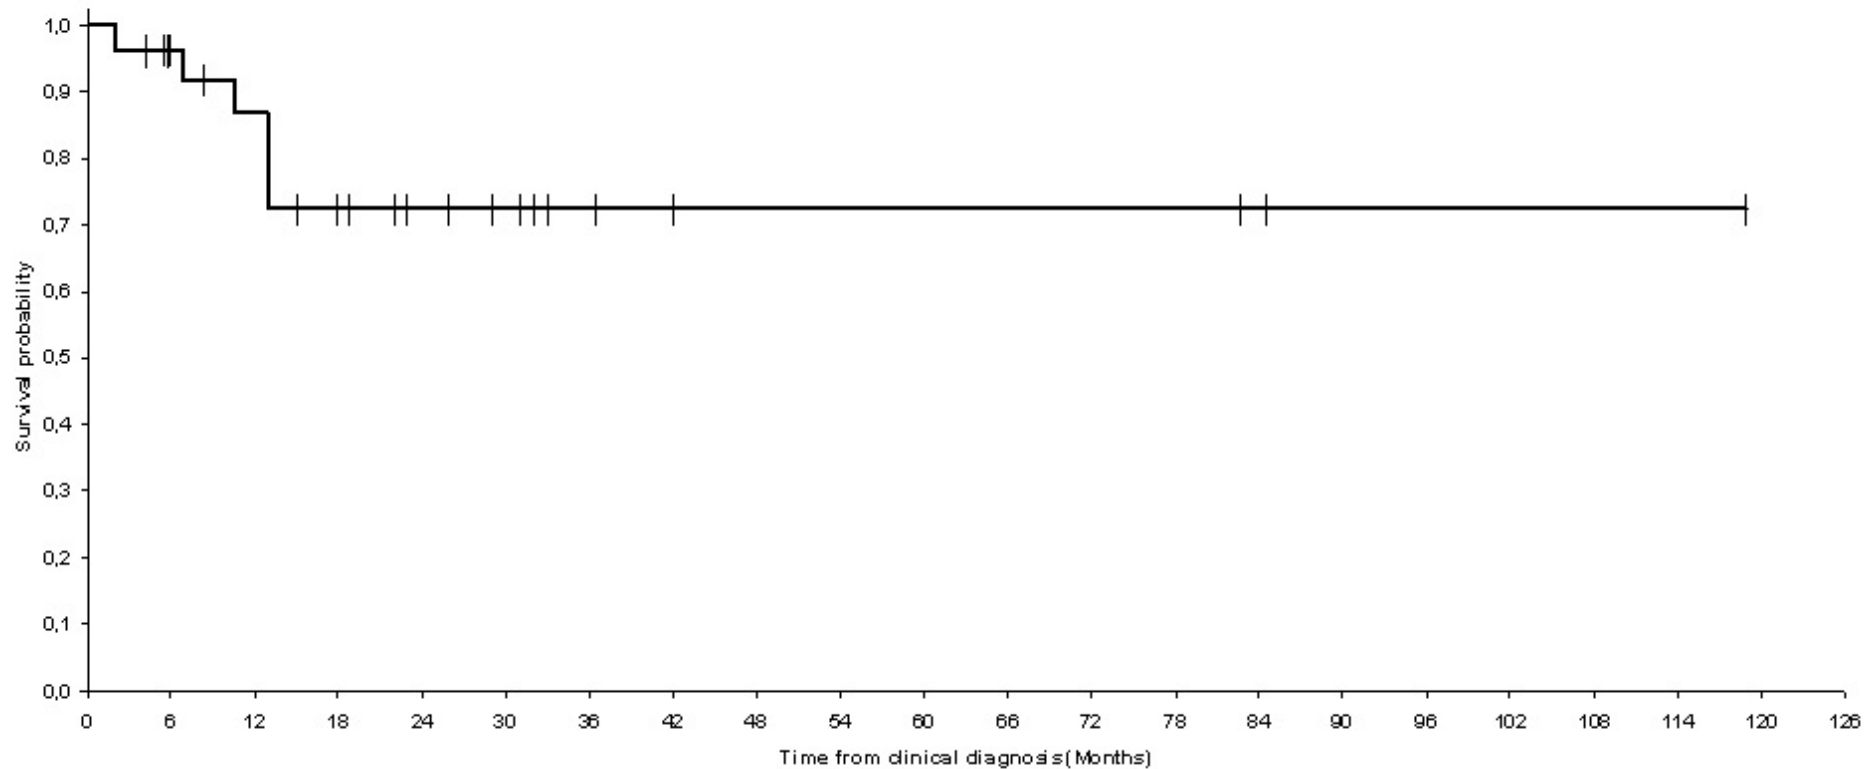

Supplement: MOESM1 [file 9515438]
